## RESEARCH REPORT

# Snail2 and Zeb2 repress *P-cadherin* to define embryonic territories in the chick embryo

Hervé Acloque<sup>1,2,\*</sup>, Oscar H. Ocaña<sup>1</sup>, Diana Abad<sup>1</sup>, Claudio D. Stern<sup>3</sup> and M. Angela Nieto<sup>1,\*</sup>

## ABSTRACT

Snail and Zeb transcription factors induce epithelial-to-mesenchymal transition (EMT) in embryonic and adult tissues by direct repression of *E-cadherin* transcription. The repression of *E-cadherin* transcription by the EMT inducers Snail1 and Zeb2 plays a fundamental role in defining embryonic territories in the mouse, as *E-cadherin* needs to be downregulated in the primitive streak and in the epiblast, concomitant with the formation of mesendodermal precursors and the neural plate, respectively. Here, we show that in the chick embryo, *E-cadherin* is weakly expressed in the epiblast at pre-primitive streak stages where it is substituted for by *P-cadherin*. We also show that *Snail2* and *Zeb2* repress *P-cadherin* transcription in the primitive streak and the neural plate, respectively. This indicates that *E-* and *P-cadherin* expression patterns evolved differently between chick and mouse. As such, the Snail1/*E-cadherin* axis described in the early mouse embryo corresponds to Snail2/*P-cadherin* in the chick, but both Snail factors and Zeb2 fulfil a similar role in chick and mouse in directly repressing ectodermal cadherin genes to contribute to the delamination of mesendodermal precursors at gastrulation and the proper specification of the neural ectoderm during neural induction.

**KEY WORDS:** E-cadherin repressors, EMT, P-cadherin, Sip1, Gastrulation, Neural plate

## INTRODUCTION

During early embryonic development, the embryo progresses from a single layer of epithelial cells (the epiblast) to a three-dimensional structure composed of several layers and territories. As part of this complex process, embryonic cells integrate environmental cues to acquire positional information, fate specification and control of cell behaviours, resulting in the formation of embryonic layers, either by modelling epithelial sheets or by inducing individual or collective cell migration. The epithelial-to-mesenchymal transition (EMT) enables delamination at the primitive streak to give rise to the definitive endoderm and mesoderm, while cells that remain in the epiblast at gastrulation contribute to the ectoderm (reviewed by Acloque et al., 2009).

The EMT program is triggered by the activation of transcription factors called EMT-TFs that include the Snail and

Zeb families (i.e. Nieto et al., 1994; Vandewalle et al., 2009), which directly repress *E-cadherin* transcription, confirming their crucial role in modulating cell adhesion (Battlé et al., 2000; Cano et al., 2000; Eger et al., 2005; Comijn et al., 2001). Snail in mammals and *Snail2* in birds are expressed in the ingressing cells at the primitive streak, in neural crest cells delaminating from the neural tube, in the presomitic mesoderm and the lateral plate mesoderm among other EMT territories (Nieto et al., 1994; Acloque et al., 2011; Blanco et al., 2007; Morales et al., 2007; Dale et al., 2006; Niessen et al., 2008). Snail1 mouse mutants maintain high levels of *E-cadherin* at the primitive streak, do not complete EMT and the resulting defective mesoderm fails to migrate (Carver et al., 2001). In chick and mouse, *Zeb2* (also known as *Sip1*) is expressed in the neural plate and neural tube. *Zeb2* does not induce EMT, as these territories remain epithelial all throughout neurulation, but defines the neural versus the non-neural ectoderm (Van de Putte, 2003; Van Grunsven et al., 2007; Vandewalle et al., 2009). Like Snail mutants, *Zeb2* mutant embryos maintain *E-cadherin* expression in the corresponding territories: the neural plate and the presumptive neural crest. These mice exhibit multiple neural crest defects, fail to specify the neuroepithelium correctly and die right after neurulation, at E9.5 (Van de Putte, 2003). All these data support the importance of *E-cadherin* repression in the definition of embryonic territories and subsequent tissue differentiation in the mouse. In the chick embryo, *L-CAM* was proposed to be the functional equivalent of *E-cadherin* in the mouse because it is expressed in the chick epiblast (Dady et al., 2012; Ohta et al., 2007). However, *L-CAM* is only faintly expressed in the epiblast of pre-primitive and primitive streak chick embryos (Moly et al., 2016 and this work). The chicken genome includes another type I cadherin, located in a cluster adjacent to *L-CAM* (*E-cadherin*). Because this is reminiscent of the organization of *P-* and *E-cadherin* in mammals, Redies and Müller (1994) proposed that this is the homologue of *P-cadherin* in the chick. Here, we show that the chick embryo mostly expresses *P-cadherin* instead of *E-cadherin* in the epiblast and that, like *E-cadherin* in the mouse, *P-cadherin* is downregulated in the mesoderm and in the induced neural plate while it is maintained in non-neural ectoderm. As *P-cadherin* expression is complementary to that of Snail and Zeb genes, we performed gain- and loss-of-function experiments to evaluate whether these epithelial repressors are responsible for the downregulation of *P-cadherin* during primitive streak stages, when *Snail2* is expressed in the streak and in the ingressing mesendoderm, and at neurulation stages, when *Zeb2/Sip1* is expressed in the early neural plate. We find that Snail2 and Zeb2 repress *P-cadherin* expression in the chick embryo as Snail1 and Zeb2 repress *E-cadherin* in the mouse, indicating a reshuffling in the expression of Snail and cadherin family members and a functional conservation in the mechanism that helps define embryonic territories in vertebrates.

<sup>1</sup>Instituto de Neurociencias de Alicante, CSIC-UMH, Avenida Ramón y Cajal s/n, San Juan de Alicante 03550, Spain. <sup>2</sup>GenPhySE, Université de Toulouse, INRA, INPT, ENVT, Castanet Tolosan 31326, France. <sup>3</sup>Department of Cell and Developmental Biology, University College London, Gower Street, London WC1E 6BT, UK.

\*Authors for correspondence (anieto@umh.es; herve.acloque@inra.fr)

© H.A., 0000-0003-4761-1055; C.D.S., 0000-0002-9907-889X; M.A.N., 0000-0002-3538-840X

## RESULTS AND DISCUSSION

### Expression profiles of type I cadherins differ between chick and mouse embryos

It is currently assumed that, as in mammals, E-cadherin (L-CAM) is expressed in the epiblast of the chicken embryo (Bobbs et al., 2012; Thierry et al., 1984). However, *in situ* hybridization for *E-cadherin* reveals very weak expression before Hamburger and Hamilton stage (HH) 9 (Hamburger and Hamilton, 1951) (Fig. 1A,D,G; Moly et al., 2016). To assess whether another cadherin could substitute for *E-cadherin* in the early chick embryo, we examined the expression of other type I cadherins and observed *N-cadherin* strongly expressed in the early mesoderm as previously described (Fig. 1B; Hatta and Takeichi, 1986; García-Castro et al., 2000), but also strong expression of *P-cadherin* in the epiblast (Fig. 1C,F). Real-time RT-PCR on embryos at pre-primitive streak (EGXI–XIII) (pre-primitive streak stages according to Eyal-Giladi and Kochav, 1976; EG), primitive streak (HH4) and neurulation (HH9) stages and in chick embryonic fibroblasts (CEFs) shows that *P-cadherin* is expressed around 10-fold more strongly than *E-cadherin* at EGXI and HH4, and 2-fold more at HH9 and *N-cadherin* is predominantly expressed in CEFs and to a lesser extent at HH4 and HH9 (Fig. S1), all confirmed by *in situ* hybridization at equivalent stages (Fig. 1A–I). Thus, *P-cadherin* is the predominant type I cadherin expressed in the chick embryo epiblast at pre-primitive and primitive streak stages. Double *in situ* hybridization for *P-* and *N-cadherin* in gastrulating embryos (Fig. 1J) shows patterns reminiscent of those described in the mouse for *E-* and *N-cadherin*, respectively (Radice et al., 1997). In the mouse, *P-cadherin* is not expressed in the epiblast and appears in the extra-embryonic ectoderm and in the visceral endoderm, and later in various embryonic epithelia (Nose and Takeichi, 1986; Hirai et al., 1989; Palacios et al., 1995; Lin and DePhilip, 1996; Xu et al., 2002). Our data suggest an exchange between the expression of *P-* and *E-cadherin* in chicken and mouse, reminiscent of the swap that occurred between the two transcription factors, *Snail1* and *Snail2*, during evolution (Locascio et al., 2002). *Snail2* in the chick shows a pattern of expression reminiscent of that of *Snail1* in the mouse.

### *Snail2* represses *P-cadherin* in the epiblast of primitive streak stage chick embryos

As expected, because of its role as an *E-cadherin* repressor, the pattern of *Snail1* expression is complementary to that of *E-cadherin* in the mouse embryo (Cano et al., 2000). Because in early chick embryos *P-cadherin* is mostly expressed in the same way as mouse *E-cadherin*, we examined whether *Snail2* and *P-cadherin* are expressed in complementary patterns during gastrulation (Fig. 1K,L). *P-cadherin* is mostly expressed in the ectoderm and its expression decreases in *Snail2* positive cells at the primitive streak and after ingression (Fig. 1M), compatible with the idea that *Snail2* may be a repressor of *P-cadherin*. To test this, we overexpressed *Snail2* in the anterior epiblast of stage HH3 embryos. Embryos showed a decrease of *P-cadherin* expression in the electroporated area when compared with the control side (Fig. 2D–F, *n*=14/14) or with embryos electroporated with a GFP-only control construct (Fig. 2A–C, *n*=11/11). Conversely, knockdown of *Snail2* using double-stranded RNA (dsRNA) (Pekarik et al., 2003) expands the territory of *P-cadherin* expression up to the midline of the embryo at the primitive streak, where it is normally downregulated (Fig. 2G–I, *n*=4/6; see Fig. S2 to assess *Snail2* downregulation, *n*=3). These data indicate that *Snail2* represses *P-cadherin* transcription in the chick epiblast.

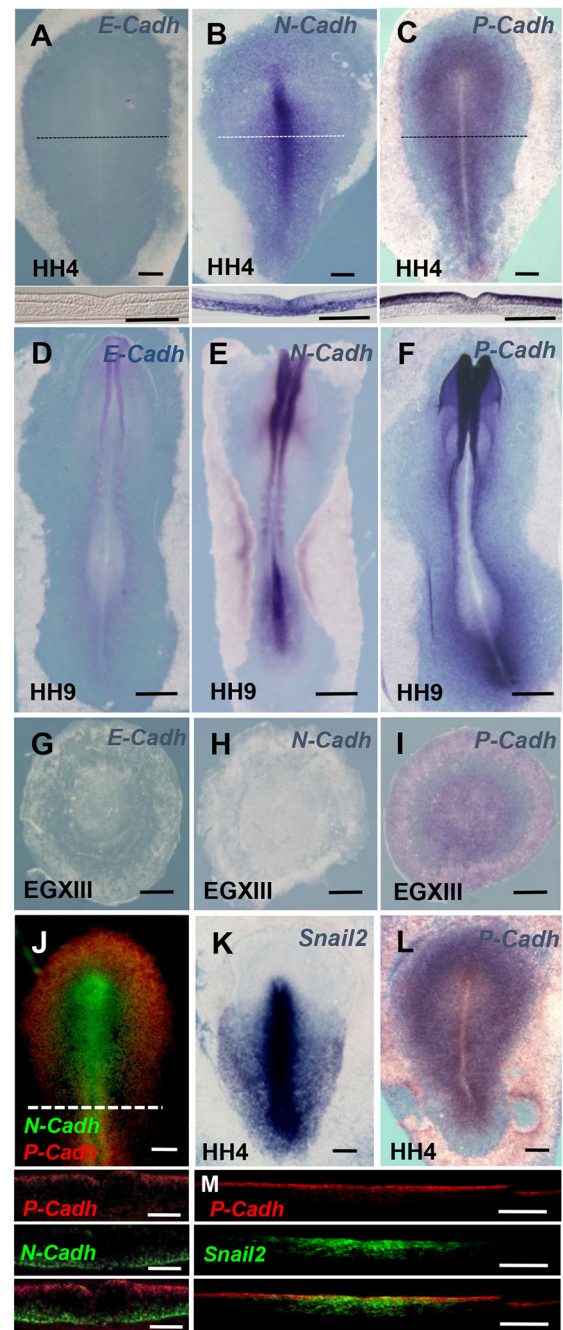

**Fig. 1. Expression of type I cadherins relative to *Snail2* in the early chick embryo.** Whole-mount *in situ* hybridization for *E-cadherin* (L-CAM), *N-cadherin* and *P-cadherin* (also called K-CAM or B-cadherin) at HH4 (A–C), HH9 (D–F) and EGXIII (G–I). (J) Double *in situ* hybridization confirms the complementary expression of *P-* and *N-cadherin* in primitive streak stage embryos. (K–M) Complementary expression of *P-cadherin* and *Snail2*. The dotted lines indicate the level of the tissue sections. Scale bars: 500 µm in A–C, K–M; 250 µm in J; 1 mm in D–I.

We have previously shown that overexpression of *Snail2* in the chick epiblast induces ectopic EMT along with downregulation of cadherin protein and disruption of the basement membrane, and that a similar mechanism operates in the mouse for *Snail1* (Acloque et al., 2011). Although a recent study proposed that downregulation of *P-* and *E-cadherin* are not necessary for EMT to occur in the chick (Moly et al., 2016), our data, in addition to



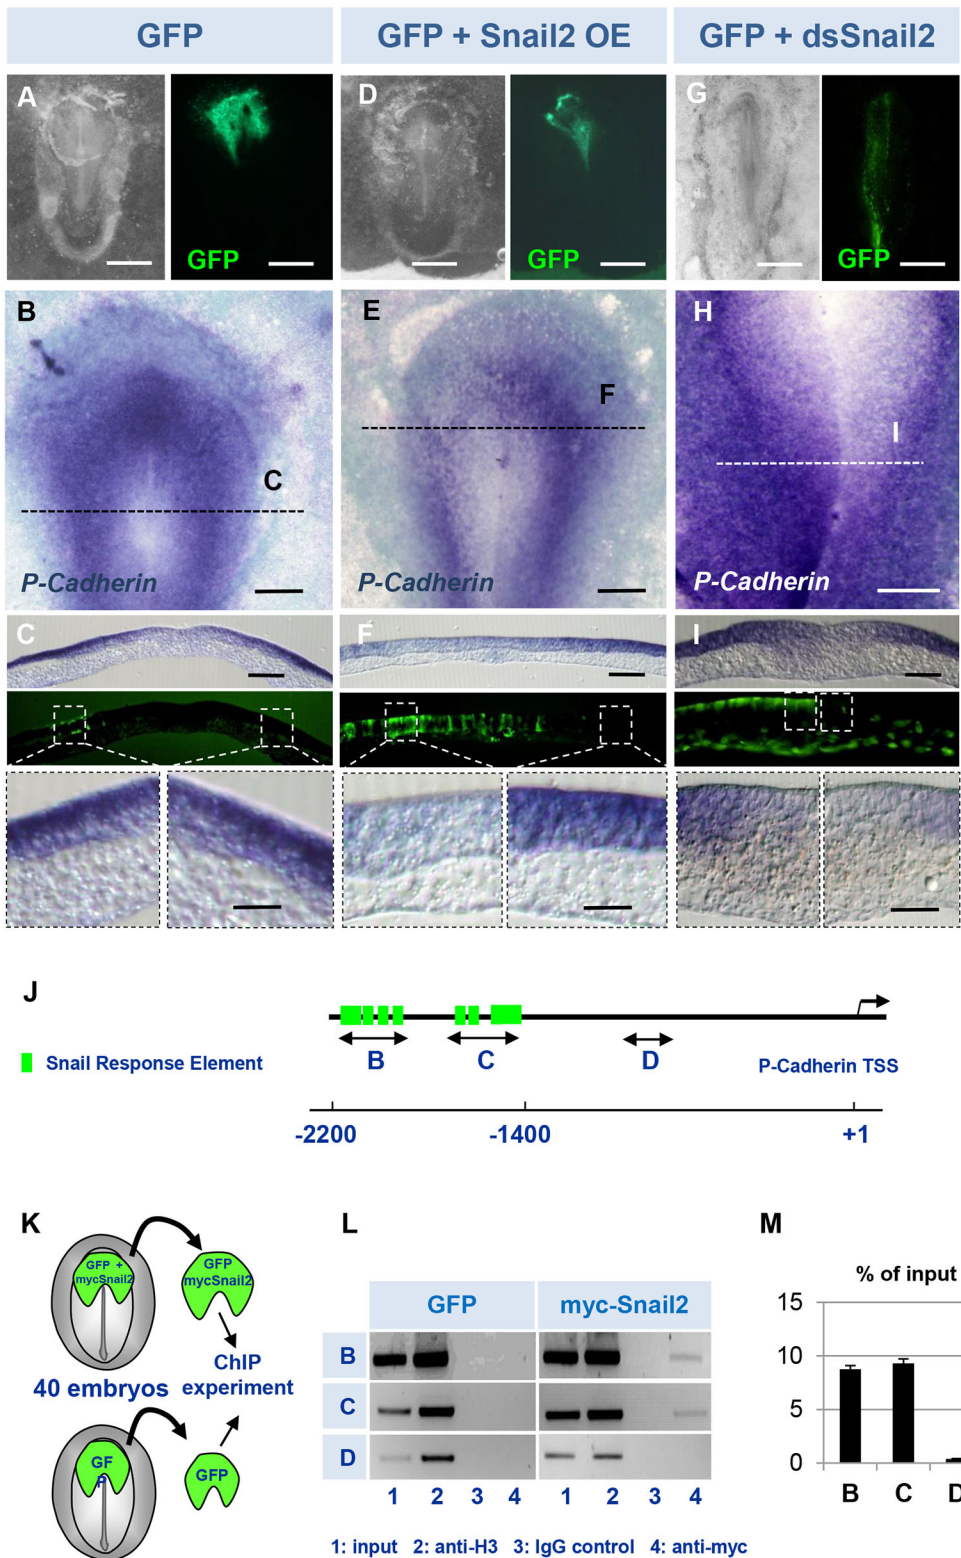

previous studies in various models (Ramkumar et al., 2016; Schäfer et al., 2014; Rogers et al., 2013; Carver et al., 2001; Wu and McClay, 2007; Oda et al., 1998), confirm the downregulation of *E-* and *P-cadherin* transcripts at sites of EMT, and support a model in which their transcriptional downregulation is necessary for the transition towards a mesenchymal tissue arrangement. As the half-life of E-cadherin

and  $\beta$ -catenin proteins at adherens junction can exceed 25 h in epithelial cell lines (Lozano and Cano, 1998), additional mechanisms favouring E-cadherin endocytosis and players such as Rho modulators, Crumbs2 or the MAP-kinase pathway are fundamental to speed the turnover and removal of E-cadherin in remodelled embryonic epithelia (Nakaya et al., 2008; Ramkumar et al., 2016; Moly et al., 2016; Zohn et al., 2006).

### Snail2 binds to the *P-cadherin* promoter *in vivo*

Snail factors repress *E-cadherin* transcription directly by binding to specific E-boxes located in the *E-cadherin* promoter (Cano et al., 2000; Batlle et al., 2000). We therefore examined whether Snail2 binds to the *P-cadherin* promoter. As the sequence of *P-cadherin* is incomplete at the 5' end of the gene in the public databases, we used RNA-seq data together with 5'-RACE and ESTs alignments to define a putative transcription start site (TSS) of the *P-cadherin* gene. After combining 5'-RACE and genomic DNA PCR amplification to obtain additional sequences, we aligned RNA-seq data on this reconstructed *P-cadherin* locus and confirm the genomic structure of the *P-cadherin* gene as containing 15 exons over 5.7 kb (Fig. S3), encompassing the full coding region (2466 bp) including the signal peptide (Brasch et al., 2012, Fig. S2B). Our study completes the sequence of the chick *P-cadherin* gene from earlier studies (Sorkin et al., 1991; Napolitano et al., 1991) and supports the idea that *P-cadherin* and *E-cadherin* have undergone tandem duplication in birds and mammals.

Snail factors bind the consensus sequence CASSTG, which is over-represented (see RNA-seq analysis in the Materials and Methods) in two regions upstream of the *P-cadherin* promoter at positions between –1400 bp and –2200 bp from the TSS (Fig. 2J). To test whether Snail2 can bind to these response elements in epiblast cells, we electroporated GFP together with either a Myc-tagged Snail2 or a myc-tagged control construct in the anterior epiblast of stage HH3 chick embryos. Ten

hours after electroporation, GFP-positive epiblast regions were dissected and processed for ChIP (Fig. 2K). Myc-tagged Snail2 overexpression led to a specific enrichment of regions B and C of the *P-cadherin* promoter after ChIP, as assessed by precipitation with an anti-Myc antibody followed by PCR with specific primers (Fig. 2L–M). Positive (panH3 antibody) and negative (rabbit anti-IgG antibody) controls confirmed the specificity of the Myc-antibody. The absence of enrichment for a control region (D) that does not contain Snail response elements confirms the specificity of Snail2 binding to regions B and C. Together, these results indicate that Snail can directly bind to and repress transcription of the *P-cadherin* gene *in vivo*.

### *P-cadherin* expression is downregulated in the neural plate concomitantly with activation of *Zeb2*

After gastrulation, *P-cadherin* expression decreases in the developing neural plate but remains expressed at its border (Fig. 3A). To identify putative transcription factors involved in this repression, we looked at EMT-related TFs expressed at neurulation stages in the chick embryo (Fig. 3B–E) and confirmed that *Zeb2* expression is expressed in the very early neural plate (Fig. 3E; Sheng et al., 2003), concomitant with the decrease of *P-cadherin* expression. Double *in situ* hybridization comparing *Zeb2*, *P-cadherin* and *Sox2* (a marker of the neural ectoderm) shows that *P-cadherin* is expressed in the non-neural ectoderm and in the neural plate border (Fig. 3F,G). *Zeb2* is expressed in the neural

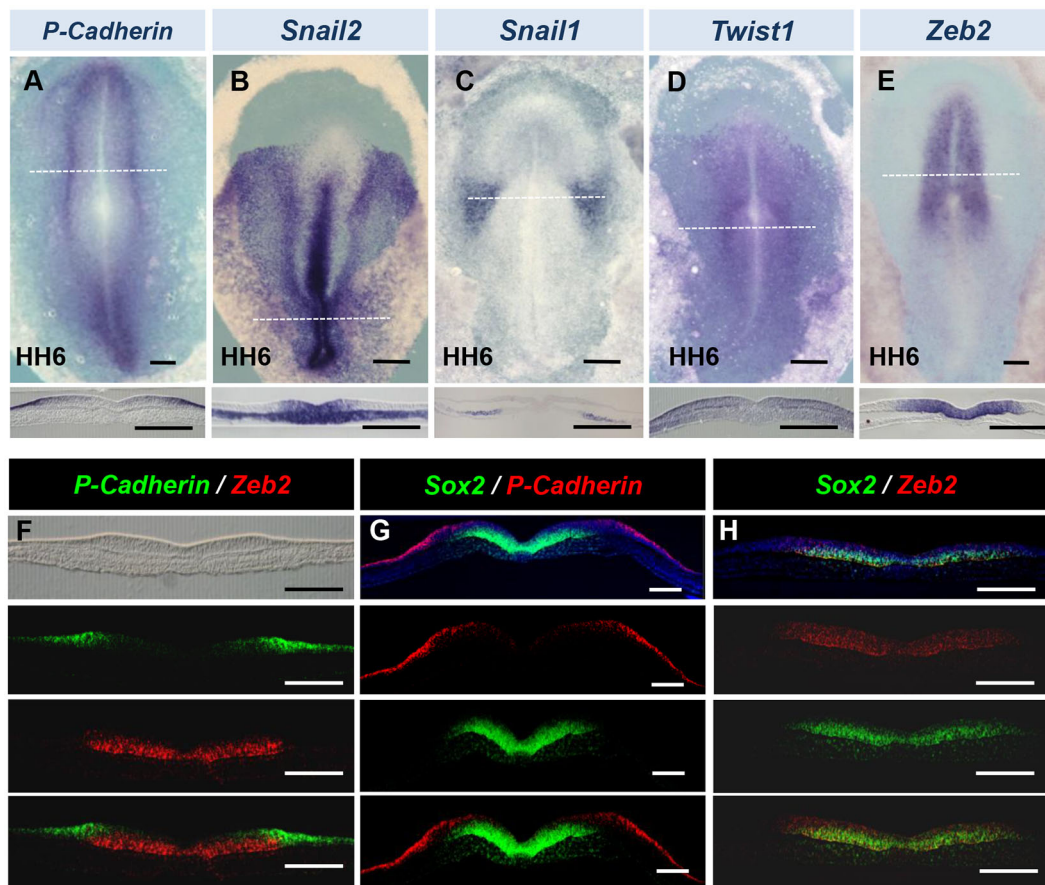

**Fig. 3. Expression of EMT inducers relative to *P-cadherin* at early neurulation stages.** (A) *P-cadherin* is downregulated in the early neural plate. (B,C) Snail genes are mostly expressed in the mesoderm. (D) *Twist1* is weakly expressed in the lateral mesoderm and the ectoderm. (E) *Zeb2* is strongly expressed in the early neural plate, at sites where *P-cadherin* is downregulated. (F–H) Expression of *Zeb2* and *P-cadherin* relative to *Sox2*. *P-cadherin* is expressed in the non-neural ectoderm and at the border of the neural plate, whereas *Zeb2* transcripts are specifically detected in a *Sox2*-positive region of the neural ectoderm devoid of *P-cadherin* expression. The dotted lines indicate the level of the tissue sections. Scale bars: 500 µm in A–E; 300 µm in F–H.



ectoderm where *P-cadherin* expression is absent (Fig. 3F–H). The neural plate border and the anterior part of the neural plate maintain *P-cadherin* expression and do not express *Zeb2*. These expression patterns highlight embryonic territories that are becoming different from each other (reviewed by Acloque et al., 2012). The complementary expression of *P-cadherin* and *Zeb2* is consistent with the idea that *Zeb2* may act as a *P-cadherin* repressor in the developing neural plate.

### **Zeb2 binds to the *P-cadherin* promoter *in vivo***

To assess whether *Zeb2* represses *P-cadherin* expression in the neural plate, we overexpressed *Zeb2* in the epiblast of stage HH3 embryos (Fig. 4A–L). *P-cadherin* transcripts were downregulated in the electroporated cells (Fig. 4D–F,  $n=18/20$ ). Conversely, blocking *Zeb2* expression with a morpholino antisense oligonucleotide previously described (Rogers et al., 2013) maintained the expression of *P-cadherin* in the neural plate at the time when is being downregulated in the control side (Fig. 4J–L,  $n=7/13$ ). ChIP assays to assess whether *Zeb2* can bind the E-boxes present in the *P-cadherin* promoter to repress its activity confirm that, as described above for *Snail2*, overexpression of a HA-tagged *Zeb2* construct (HA-*Zeb2*) followed by ChIP shows binding to regions B and C of the *P-cadherin* promoter (Fig. 4M,N). Efficiency and specificity of this experiment were evaluated in a similar manner to that shown in Fig. 2. As for *Snail2*, these results indicate that *Zeb2* can directly bind to and repress transcription of the *P-cadherin* gene *in vivo*.

### **Snail2 and Zeb2 directly repress *P-cadherin* expression in the developing chicken embryo**

Once shown that both *Zeb2* and *Snail2* bind *P-cadherin in vivo* at regions where *P-cadherin* expression is downregulated, we examined whether they could directly repress promoter activity by transfecting a *P-cadherin* promoter reporter construct in the presence or absence of *Zeb2* and *Snail2* in COS cells (Fig. 4O). This confirmed that both *Zeb2* and *Snail2* can directly repress *P-cadherin* transcription. It is worth noting here that *Zeb2* does not repress *E-cadherin* expression whereas *Snail2* does (Fig. S4A–I). This is consistent with the absence of *P-cadherin* and the presence of *E-cadherin* protein in the neural tube (Dady et al., 2012) and also with the finding that *Zeb2* overexpression is not sufficient to induce EMT in the neural plate cells. Instead, its role in the neural tube is modulating the border between neural and non neural ectoderm (Fig. S4J–R). This indicates that *Zeb2* contributes to the definition of neural versus non-neural ectoderm.

Together, our data show that, in primitive streak stage chick embryos, *P-cadherin* is the functional homolog of *E-cadherin* in mammals, and that the sequential activation of different EMT-TFs to repress type I cadherins in the primitive streak and the neural tube is conserved and contributes to the definition of embryonic territories in vertebrates.

## **MATERIALS AND METHODS**

### **Chick embryos and explant cultures**

Fertilized hens' eggs were purchased from Granja Gilbert (Tarragona, Spain). The eggs were incubated, opened and the embryos explanted for EC culture as described previously (Flamme, 1987; Chapman et al., 2001). Embryos were staged according to Eyal-Giladi and Kochav (1976) (EG stage) and Hamburger and Hamilton (1951) (HH stage).

### **Chick embryos electroporation**

Explanted embryos at HH2–HH3 were placed, vitelline membrane and filter paper down, in an electroporation chamber (NEPAGEN) connected to the

negative pole of a current pulse generator. A solution containing expression plasmids (2 mg/ml in PBS with 0.1% Fast Green and 6% sucrose), dsRNA (Pekarik et al., 2003) or morpholinos (MOs at 1  $\mu$ M in PBS together with 1  $\mu$ g/ $\mu$ l pCX plasmid, 0.1% Fast Green and 6% sucrose) was injected between the vitelline membrane and the epiblast. An anodal electrode was placed over the ventral side of the embryo to cover the injected area. A train of electric pulses (5 pulses, 4 V, 50 ms, 0.5 Hz) was applied using an Intracel TSS10 pulse stimulator (Intracel). In all experiments, the non-electroporated right side of the embryo was used as a control.

### **DNA constructs**

pCX-*Snail2*, pCX-GFP and pCX-myc*Snail2* expression vectors were described previously (Morales et al., 2007; Acloque et al., 2011). Full-length *Zeb2* was amplified using degenerate primers from sequence alignment of the ATG region of *Xenopus*, human and mouse orthologues 5'-ACCATGAAGCARSNGATCATG-3' and a previously published sequence of the C-terminal region (Sheng et al., 2003). Full-length *Zeb2* and HA-*Zeb2* were sequenced and cloned in pCX at the *Eco*R1 restriction site.

The *P-cadherin* promoter was amplified by PCR using primers described in Table S1 using KAPA High Fidelity HotStart polymerase and then subcloned at the *Kpn*I restriction site of pGL2-basic (Promega) to produce the p1821-luc plasmid. The whole *P-cadherin* gene sequence was deposited in GenBank with the Accession Number KY120274.

### **Cell transfections and promoter activity assays**

Cell transfections were carried out as described by Acloque et al. (2004) in COS7 cells (free of mycoplasma contamination) and using pRL-TK to normalize for transfection efficiency. Reporter p1821-luc plasmid (300 ng) and 300 ng of empty pCX plasmid, pCX-*Snail2* or pCX-*Zeb2* were used. Firefly and Renilla luciferase luminescence assays were successively performed using a Dual Luciferase Assay (Promega) as described by the manufacturer.

### **Whole-mount *in situ* hybridization**

Whole-mount *in situ* hybridization was carried out as described previously (Nieto et al., 1996) but omitting the proteinase K treatment. Digoxigenin-labelled probes were synthesized from the partial or full-length chicken cDNAs of *Snail1*, *Snail2*, *L-CAM*, *N-cadherin*, *Sox2* (Nieto et al., 1994; Sefton et al., 1998) and from expressed sequence tags (EST; Boardman et al., 2002) for *P-cadherin* (ChEST913f11) and *Twist1* (ChEST613g12). The *Zeb2* probe was generated by RT-PCR and subsequent cloning in pGEMT-easy (Promega). For whole-mount fluorescent *in situ* hybridization, embryos were processed as previously described (Acloque et al., 2008). Peroxidase activity was successively detected with the TSA-plus Cy3 and fluorescein kits (Perkin Elmer). In some cases, embryos were subjected to immunostaining with anti-GFP antibody (A6455, Thermo Scientific, 1:1000). After *in situ* hybridization, embryos were photographed and subsequently embedded in gelatin, sectioned at 40  $\mu$ m and photographed using a Leica DMR microscope under Nomarski DIC optics.

### **Chromatin immunoprecipitation (ChIP)**

Chick embryos were electroporated with GFP and control myc-Tag or control HA-Tag, with GFP and myc-*Snail2* or with GFP and HA-*Zeb2* expression plasmids. Eight hours after electroporation, GFP-positive tissues were dissected from HH5 embryos. ChIP assays were performed as previously described (Acloque et al., 2011). For each assay, we used a pool of 40 embryos (corresponding to  $\sim 3 \times 10^5$  cells). The following antibodies were used for chromatin immunoprecipitation: anti-myc ChIP grade (ab9132, Abcam), anti-HA ChIP grade (ab9110, Abcam), anti-H3 ChIP grade (ab1791, Abcam) or rabbit IgG control (C15410206, Diagenode) using 1  $\mu$ g of antibody for each tissue lysate. DNA was amplified by PCR and quantified using H3 samples as a reference.

### **PCR and real-time PCR**

DNA obtained from the ChIP experiments was amplified using primers corresponding to regions B, C and D of the *P-cadherin* promoter (see Table S1 for sequences). Efficiency of primers designed for real-time PCR

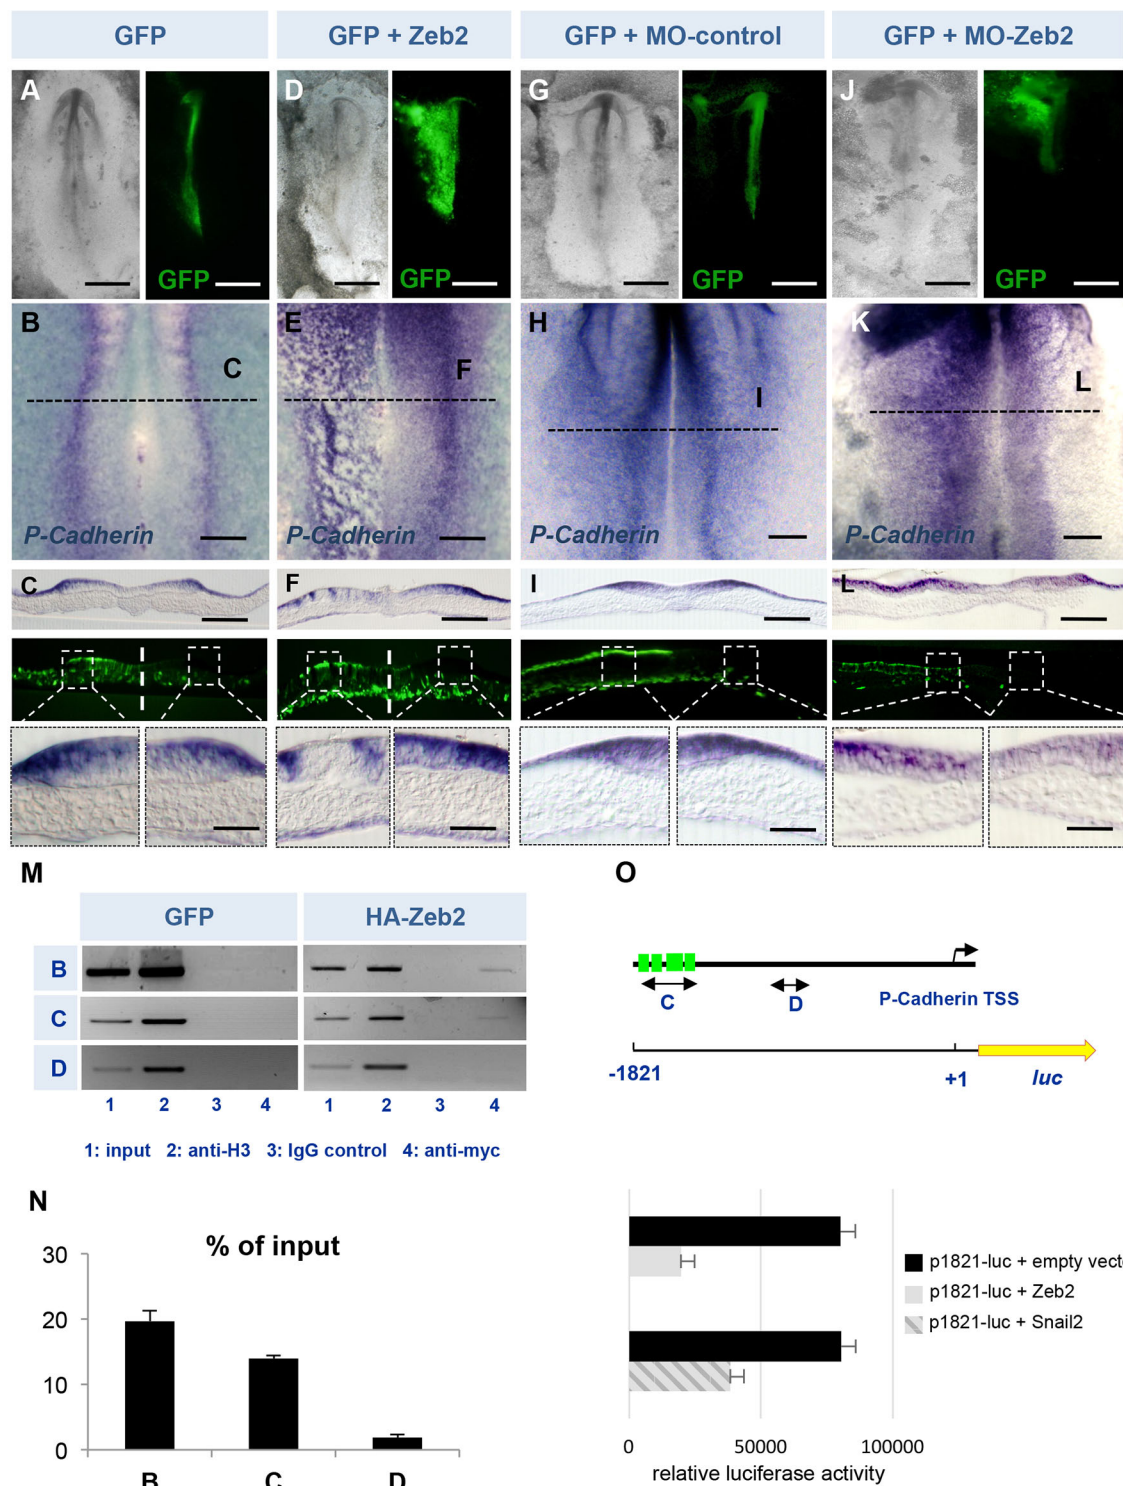

**Fig. 4. Zeb2 directly represses *P-cadherin* transcription in the neural plate.** (A–C) GFP electroporation does not affect *P-cadherin* expression in the neural plate of HH7 embryos. (D–F) Zeb2 overexpression represses *P-cadherin* expression in the neural ectoderm (compare the electroporated versus the control side). (G–I) Control morpholino (MO-control) electroporation does not affect *P-cadherin* expression in the neural plate of HH7 embryos. (J–L) Zeb2 downregulation after electroporation of a morpholino directed against the ATG (MO-Zeb2) increases *P-cadherin* expression and extends it to the midline of the embryo. (M) Zeb2 binds to *P-cadherin* promoter *in vivo*. Chromatin immunoprecipitation (ChIP) from electroporated neural plates overexpressing either GFP alone or together with a HA-tagged Zeb2. DNA from the chromatin-enriched fraction was amplified by PCR. Amplification from input DNA is shown in lane 1, and positive and negative controls using either a panH3 antibody or an IgG control are shown in lanes 2 and 3, respectively. Regions B and C are specifically enriched using an antibody directed against HA when HA-Zeb2 was electroporated in the epiblast (compare GFP with HA-Zeb2 conditions in lane 4). (N) Quantification of the enrichment shown in M. Regions B, C and D are described in Fig. 2. Data represent mean±s.d. of three independent experiments. (O) The reporter construct (*P1821-luc*) used to quantify *P-cadherin* promoter activity. COS7 cells were transfected with p1821-luc together with an empty expression vector (black bars), with a Zeb2 expression vector (grey bar) or with a Snail2 expression vector (striped grey bar). Data represent mean±s.d. of two independent experiments. Scale bars: 1 mm in A,D,G,J; 500 µm in B,C,E,F,H,I,K,L; 150 µm in the higher magnification panels of the sections.



amplification of *P-cadherin*, *E-cadherin*, *N-cadherin*, *ACTB* (Voiculescu et al., 2007), *GAPDH* (Voiculescu et al., 2007) and *RS17* (Laval et al., 2007) was estimated by standard curve production (Table S1). Reverse transcription of total RNA from EGX-XII, HH4 and HH9 embryos, and chicken embryonic fibroblasts (CEFs) was performed using Maxima First Strand cDNA Synthesis Kit for RT-qPCR (Thermo Scientific), according to the manufacturer's guidelines. Real-time PCRs were performed using SYBR Green mix (Thermo) in a StepOnePlus thermocycler (Thermo). Relative gene expressions were determined using the  $\Delta\Delta C_t$  method corrected for primer efficiencies with the StepOne Software v2.3 (Thermo), using *RS17* as reference gene (Fig. S3B,C) and HH9 as reference sample (Fig. S3C).

### RNA-seq analysis

Data from Frésard et al. (2014) (NCBI SRA Accession Number: SRP033603) were used for analysis. Transcript sequences from two chicken embryos (d4.5) were aligned using Tophat 2.0.5 (<http://ccb.jhu.edu/software/tophat/index.shtml>) on the reconstructed *P-* and *E-cadherin* regions. Data were visualized on IGV2.3. Transcription start site was defined by the limit of read alignment at the 5' end of the first exon. Frequency of CASSTG was calculated as follows: random frequency corresponds to one CASSTG site each 1024 bp ( $1/4^4 \times 2^4 \times 4^4$ ). We observed ten CASSTG in 800 bp for B and C regions upstream of the *P-cadherin* promoters, a 12-fold higher frequency than expected at random.

### Nomenclature

The three chicken type I cadherins were previously named *L-CAM* for *E-cadherin* (*CDH1*), *N-cadherin* (*CDH2*) and *K-CAM* or *B-cadherin* for *P-cadherin* (*CDH3*). To avoid confusion, we use *E-cadherin* for *L-CAM* (*CDH1*), *N-cadherin* for *CDH2* and *P-cadherin* for *K-CAM/B-cadherin/CDH3*.

### Acknowledgements

We thank members of Angela Nieto's lab for continuous helpful discussions. Hervé Acloque particularly thanks Eric Théveneau, Fabienne Pituello and Sophie Bel-Vialar for eggs and access to their experimental embryology rooms.

### Competing interests

The authors declare no competing or financial interests.

### Author contributions

H.A. designed and performed the majority of experiments, analysed the data and wrote the manuscript; O.H.O. contributed to electroporation experiments; D.A. performed expression studies; C.D.S. interpreted the data, hosted H.A. for the completion of some experiments and contributed to the writing of the manuscript; M.A.N. conceived the project, designed experiments, interpreted the data and wrote the manuscript.

### Funding

This work was supported by grants from the Ministerio de Economía y Competitividad (BFU2008-01042 and BFU2014-53128-R), by the Generalitat Valenciana (PROMETEOII/2013/002) and by the European Research Council (ERC AdG 322694) to M.A.N., who also acknowledges financial support from the Agencia Estatal de Investigación, through the 'Severo Ochoa' Programme for Centres of Excellence in R&D (SEV-2013-0317).

### Data availability

The whole *P-cadherin* gene sequence was deposited in GenBank with the Accession Number KY120274.

### Supplementary information

Supplementary information available online at <http://dev.biologists.org/lookup/doi/10.1242/dev.142562.supplemental>

### References

- Acloque, H., Mey, A., Birot, A. M., Gruffat, H., Pain, B. and Samarut, J. (2004). Transcription factor cCP2 controls gene expression in chicken embryonic stem cells. *Nucleic Acids Res.* **32**, 2259–2271.
- Acloque, H., Wilkinson, D. G. and Nieto, M. A. (2008). In situ hybridization analysis of chick embryos in whole-mount and tissue sections. *Methods Cell Biol.* **87**, 169–185.
- Acloque, H., Adams, M. S., Fishwick, K., Bronner-Fraser, M. and Nieto, M. A. (2009). Epithelial-mesenchymal transitions: the importance of changing cell state in development and disease. *J. Clin. Invest.* **119**, 1438–1449.
- Acloque, H., Ocaña, O. H., Matheu, A., Rizzoti, K., Wise, C., Lovell-Badge, R. and Nieto, M. A. (2011). Reciprocal repression between Sox3 and snail transcription factors defines embryonic territories at gastrulation. *Dev. Cell* **21**, 546–558.
- Acloque, H., Ocaña, O. H. and Nieto, M. A. (2012). Mutual exclusion of transcription factors and cell behaviour in the definition of vertebrate embryonic territories. *Curr. Opin. Genet. Dev.* **22**, 308–314.
- Battle, E., Sancho, E., Francí, C., Domínguez, D., Monfar, M., Baulida, J. and García de Herreros, A. (2000). The transcription factor snail is a repressor of *E-cadherin* gene expression in epithelial tumour cells. *Nat. Cell Biol.* **2**, 84–89.
- Blanco, M. J., Barrallo-Gimeno, A., Acloque, H., Reyes, A. E., Tada, M., Allende, M. L., Mayor, R. and Nieto, M. A. (2007). Snail1a and Snail1b cooperate in the anterior migration of the axial mesendoderm in the zebrafish embryo. *Development* **134**, 4073–4081.
- Boardman, P. E., Sanz-Ezquerro, J., Overton, I. M., Burt, D. W., Bosch, E., Fong, W. T., Tickle, C., Brown, W. R. A., Wilson, S. A. and Hubbard, S. J. (2002). A comprehensive collection of chicken cDNAs. *Curr. Biol.* **12**, 1965–1969.
- Bobbs, A. S., Saarela, A. V., Yatskevych, T. A. and Antin, P. B. (2012). Fibroblast growth factor (FGF) signaling during gastrulation negatively modulates the abundance of microRNAs that regulate proteins required for cell migration and embryo patterning. *J. Biol. Chem.* **287**, 38505–38514.
- Brasch, J., Harrison, O. J., Honig, B. and Shapiro, L. (2012). Thinking outside the cell: how cadherins drive adhesion. *Trends Cell Biol.* **22**, 299–310.
- Cano, A., Pérez-Moreno, M. A., Rodrigo, I., Locascio, A., Blanco, M. J., del Barrio, M. G., Portillo, F. and Nieto, M. A. (2000). The transcription factor snail controls epithelial-mesenchymal transitions by repressing *E-cadherin* expression. *Nat. Cell Biol.* **2**, 76–83.
- Carver, E. A., Jiang, R., Lan, Y., Oram, K. F. and Gridley, T. (2001). The mouse snail gene encodes a key regulator of the epithelial-mesenchymal transition. *Mol. Cell Biol.* **21**, 8184–8188.
- Chapman, S. C., Collignon, J., Schoenwolf, G. C. and Lumsden, A. (2001). Improved method for chick whole-embryo culture using a filter paper carrier. *Dev. Dyn.* **220**, 284–289.
- Comijn, J., Berx, G., Vermassen, P., Verschuere, K., van Grunsven, L., Bruyneel, E., Mareel, M., Huylebroeck, D. and van Roy, F. (2001). The two-handed E box binding zinc finger protein SIP1 downregulates *E-cadherin* and induces invasion. *Mol. Cell* **7**, 1267–1278.
- Dady, A., Blavet, C. and Duband, J.-L. (2012). Timing and kinetics of *E-* to *N-cadherin* switch during neurulation in the avian embryo. *Dev. Dyn.* **241**, 1333–1349.
- Dale, J. K., Malapert, P., Chal, J., Vilhais-Neto, G., Maroto, M., Johnson, T., Jayasinghe, S., Trainor, P., Herrmann, B. and Pourquie, O. (2006). Oscillations of the snail genes in the presomitic mesoderm coordinate segmental patterning and morphogenesis in vertebrate somitogenesis. *Dev. Cell* **10**, 355–366.
- Eger, A., Aigner, K., Sonderegger, S., Dampier, B., Oehler, S., Schreiber, M., Berx, G., Cano, A., Beug, H. and Foisner, R. (2005). DeltaEF1 is a transcriptional repressor of *E-cadherin* and regulates epithelial plasticity in breast cancer cells. *Oncogene* **24**, 2375–2385.
- Eyal-Giladi, H. and Kochav, S. (1976). From cleavage to primitive streak formation: a complementary normal table and a new look at the first stages of the development of the chick. I. General morphology. *Dev. Biol.* **49**, 321–337.
- Flamme, I. (1987). Prolonged and simplified in vitro culture of explanted chick embryos. *Anat. Embryol. (Berl.)* **176**, 45–52.
- Frésard, L., Leroux, S., Servin, B., Gourichon, D., Dehais, P., Cristobal, M. S., Marsaud, N., Vignoles, F., Bed'hom, B., Coville, J.-L. et al. (2014). Transcriptome-wide investigation of genomic imprinting in chicken. *Nucleic Acids Res.* **42**, 3768–3782.
- García-Castro, M. I., Vielmetter, E. and Bronner-Fraser, M. (2000). *N-Cadherin*, a cell adhesion molecule involved in establishment of embryonic left-right asymmetry. *Science* **288**, 1047–1051.
- Hamburger, V. and Hamilton, H. L. (1951). A series of normal stages in the development of the chick embryo. *J. Morphol.* **88**, 49–92.
- Hatta, K. and Takeichi, M. (1986). Expression of *N-cadherin* adhesion molecules associated with early morphogenetic events in chick development. *Nature* **320**, 447–449.
- Hirai, Y., Nose, A., Kobayashi, S. and Takeichi, M. (1989). Expression and role of *E-* and *P-cadherin* adhesion molecules in embryonic histogenesis. II. Skin morphogenesis. *Development* **105**, 271–277.
- Laval, F., Acloque, H., Bertocchini, F., MacLeod, D. J., Boast, S., Bachelard, E., Montillet, G., Thenot, S., Sang, H. M., Stern, C. D. et al. (2007). The Oct4 homologue PouV and Nanog regulate pluripotency in chicken embryonic stem cells. *Development* **134**, 3549–3563.
- Lin, L.-H. and DePhilip, R. M. (1996). Sex-dependent expression of placental (*P*)-cadherin during mouse gonadogenesis. *Anat. Rec.* **246**, 535–544.
- Locascio, A., Manzanares, M., Blanco, M. J. and Nieto, M. A. (2002). Modularity and reshuffling of Snail and Slug expression during vertebrate evolution. *Proc. Natl. Acad. Sci. USA* **99**, 16841–16846.

- Lozano, E. and Cano, A.** (1998). Induction of mutual stabilization and retardation of tumor growth by coexpression of plakoglobin and E-cadherin in mouse skin spindle carcinoma cells. *Mol. Carcinog.* **21**, 273–287.
- Moly, P. K., Cooley, J. R., Zeltzer, S. L., Yatskievych, T. A. and Antin, P. B.** (2016). Gastrulation EMT is independent of P-cadherin downregulation. *PLoS ONE* **11**, e0153591.
- Morales, A. V., Acloque, H., Ocaña, O. H., de Frutos, C. A., Gold, V. and Nieto, M. A.** (2007). Snail genes at the crossroads of symmetric and asymmetric processes in the developing mesoderm. *EMBO Rep.* **8**, 104–109.
- Nakaya, Y., Sukowati, E. W., Wu, Y. and Sheng, G.** (2008). RhoA and microtubule dynamics control cell–basement membrane interaction in EMT during gastrulation. *Nat. Cell Biol.* **10**, 765–775.
- Napolitano, E. W., Venstrom, K., Wheeler, E. F. and Reichardt, L. F.** (1991). Molecular cloning and characterization of B-cadherin, a novel chick cadherin. *J. Cell Biol.* **113**, 893–905.
- Niessen, K., Fu, Y., Chang, L., Hoodless, P. A., McFadden, D. and Karsan, A.** (2008). Slug is a direct Notch target required for initiation of cardiac cushion cellularization. *J. Cell Biol.* **182**, 315–325.
- Nieto, M. A., Sargent, M. G., Wilkinson, D. G. and Cooke, J.** (1994). Control of cell behavior during vertebrate development by Slug, a zinc finger gene. *Science* **264**, 835–839.
- Nieto, M. A., Patel, K. and Wilkinson, D. G.** (1996). In situ hybridization analysis of chick embryos in whole mount and tissue sections. *Methods Cell Biol.* **51**, 219–235.
- Nose, A. and Takeichi, M.** (1986). A novel cadherin cell adhesion molecule: its expression patterns associated with implantation and organogenesis of mouse embryos. *J. Cell Biol.* **103**, 2649–2658.
- Oda, H., Tsukita, S. and Takeichi, M.** (1998). Dynamic behavior of the cadherin-based cell–cell adhesion system during *Drosophila* gastrulation. *Dev. Biol.* **203**, 435–450.
- Ohta, S., Suzuki, K., Tachibana, K., Tanaka, H. and Yamada, G.** (2007). Cessation of gastrulation is mediated by suppression of epithelial–mesenchymal transition at the ventral ectodermal ridge. *Development* **134**, 4315–4324.
- Palacios, J., Benito, N., Berraquero, R., Pizarro, A., Cano, A. and Gamallo, C.** (1995). Differential spatiotemporal expression of E- and P-cadherin during mouse tooth development. *Int. J. Dev. Biol.* **39**, 663–666.
- Pekarik, V., Bourikas, D., Miglino, N., Joset, P., Preiswerk, S. and Stoeckli, E. T.** (2003). Screening for gene function in chicken embryo using RNAi and electroporation. *Nat. Biotechnol.* **21**, 93–96.
- Radice, G. L., Ferreira-Cornwell, M. C., Robinson, S. D., Rayburn, H., Chodosh, L. A., Takeichi, M. and Hynes, R. O.** (1997). Precocious mammary gland development in P-cadherin-deficient mice. *J. Cell Biol.* **139**, 1025–1032.
- Ramkumar, N., Omelchenko, T., Silva-Gagliardi, N. F., McGlade, C. J., Wijnholds, J. and Anderson, K. V.** (2016). Crumbs2 promotes cell ingression during the epithelial-to-mesenchymal transition at gastrulation. *Nat. Cell Biol.* **18**, 1281–1291.
- Redies, C. and Müller, H.-A. J.** (1994). Similarities in structure and expression between mouse P-cadherin, chicken B-cadherin and frog XB/U-cadherin. *Cell Adhes. Commun.* **2**, 511–520.
- Rogers, C. D., Saxena, A. and Bronner, M. E.** (2013). Sip1 mediates an E-cadherin-to-N-cadherin switch during cranial neural crest EMT. *J. Cell Biol.* **203**, 835–847.
- Schäfer, G., Narasimha, M., Vogelsang, E. and Leptin, M.** (2014). Cadherin switching during the formation and differentiation of the *Drosophila* mesoderm – implications for epithelial-to-mesenchymal transitions. *J. Cell Sci.* **127**, 1511–1522.
- Sefton, M., Sánchez, S. and Nieto, M. A.** (1998). Conserved and divergent roles for members of the Snail family of transcription factors in the chick and mouse embryo. *Development* **125**, 3111–3121.
- Sheng, G., dos Reis, M. and Stern, C. D.** (2003). Churchill, a zinc finger transcriptional activator, regulates the transition between gastrulation and neurulation. *Cell* **115**, 603–613.
- Sorkin, B. C., Gallin, W. J., Edelman, G. M. and Cunningham, B. A.** (1991). Genes for two calcium-dependent cell adhesion molecules have similar structures and are arranged in tandem in the chicken genome. *Proc. Natl. Acad. Sci. USA* **88**, 11545–11549.
- Thiery, J.-P., Delouée, A., Gallin, W. J., Cunningham, B. A. and Edelman, G. M.** (1984). Ontogenetic expression of cell adhesion molecules: L-CAM is found in epithelia derived from the three primary germ layers. *Dev. Biol.* **102**, 61–78.
- Van de Putte, T., Maruhashi, M., Francis, A., Nelles, L., Kondoh, H., Huylebroeck, D. and Higashi, Y.** (2003). Mice lacking Zfx1b, the gene that codes for Smad-interacting protein-1, reveal a role for multiple neural crest cell defects in the etiology of Hirschsprung disease–mental retardation syndrome. *Am. J. Hum. Genet.* **72**, 465–470.
- van Grunsven, L. A., Taelman, V., Michiels, C., Verstappen, G., Souopgui, J., Nichane, M., Moens, E., Opdecamp, K., Vanhomwegen, J., Kricha, S. et al.** (2007). XSip1 neuralizing activity involves the co-repressor CtBP and occurs through BMP dependent and independent mechanisms. *Dev. Biol.* **306**, 34–49.
- Vandewalle, C., Van Roy, F. and Berx, G.** (2009). The role of the ZEB family of transcription factors in development and disease. *Cell. Mol. Life Sci.* **66**, 773–787.
- Voiculescu, O., Bertocchini, F., Wolpert, L., Keller, R. E. and Stern, C. D.** (2007). The amniote primitive streak is defined by epithelial cell intercalation before gastrulation. *Nature* **449**, 1049–1052.
- Wu, S.-Y. and McClay, D. R.** (2007). The Snail repressor is required for PMC ingression in the sea urchin embryo. *Development* **134**, 1061–1070.
- Xu, L., Overbeek, P. A. and Reneker, L. W.** (2002). Systematic analysis of E-, N- and P-cadherin expression in mouse eye development. *Exp. Eye Res.* **74**, 753–760.
- Zohn, I. E., Li, Y., Skolnik, E. Y., Anderson, K. V., Han, J. and Niswander, L.** (2006). p38 and a p38-interacting protein are critical for downregulation of E-cadherin during mouse gastrulation. *Cell* **125**, 957–969.
